# Supplementary material for: Magnolol Induces the Extrinsic/Intrinsic Apoptosis Pathways and Inhibits STAT3 Signaling-Mediated Invasion of Glioblastoma Cells
Source: MDPI journal article supplement (doi:10.3390/life11121399), 2021-12-14
Supplement: s1 [file s1]

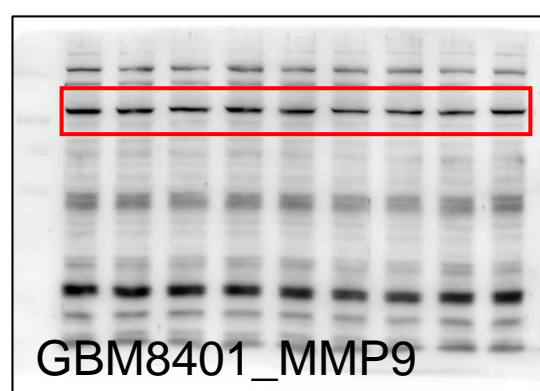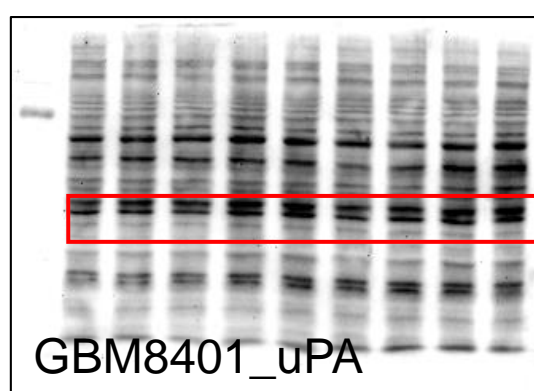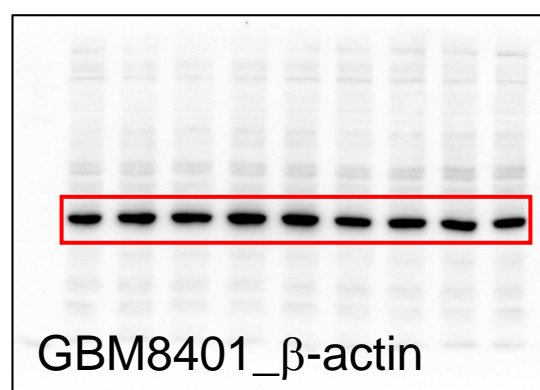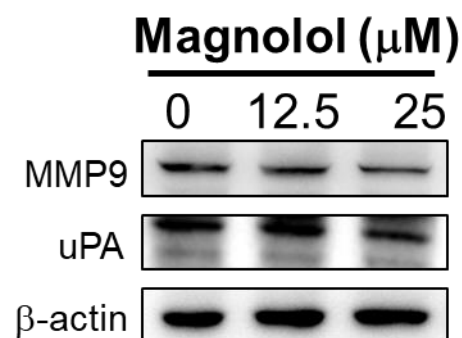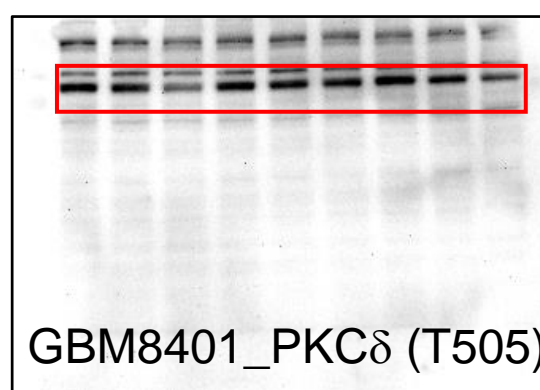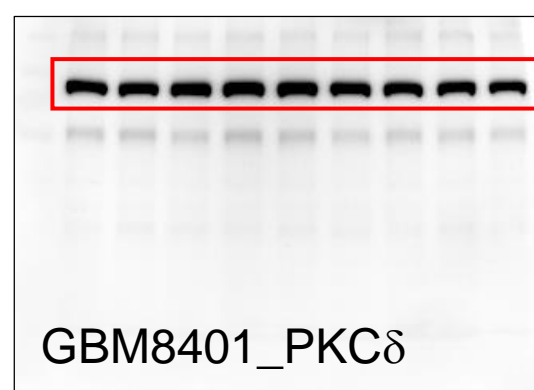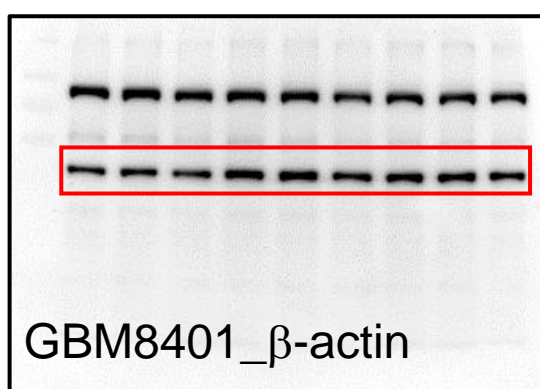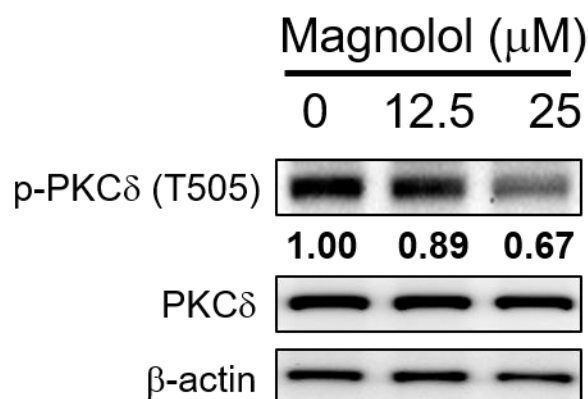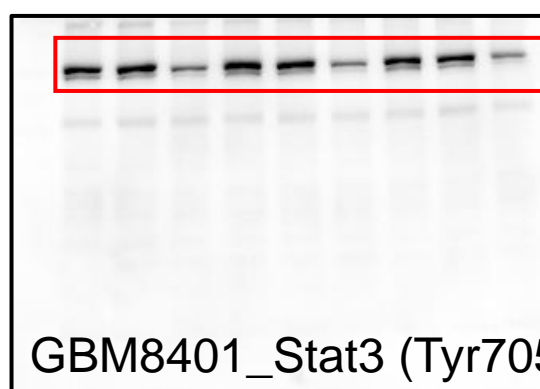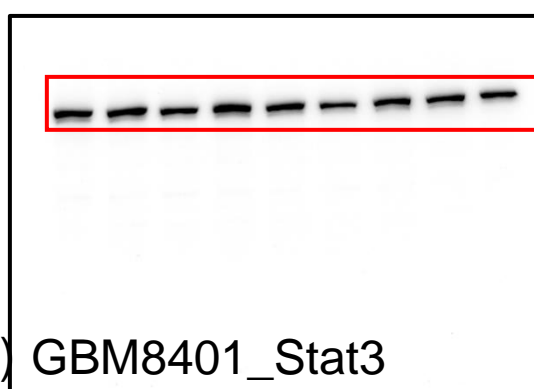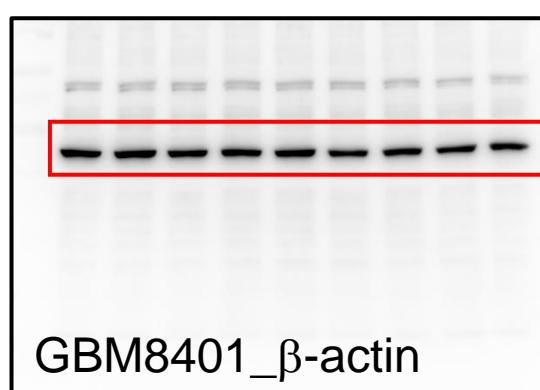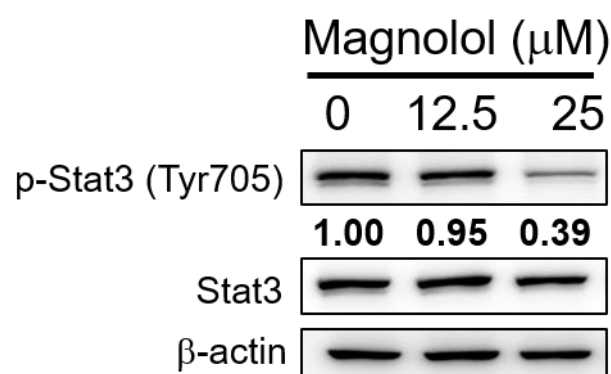

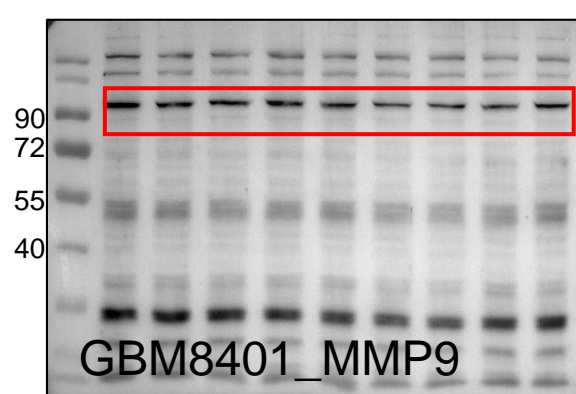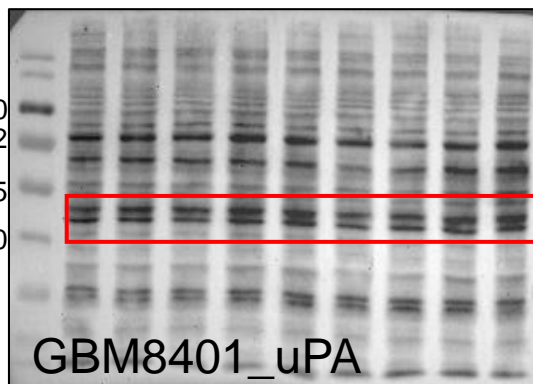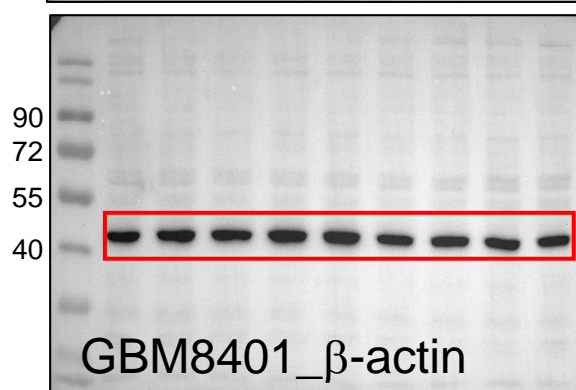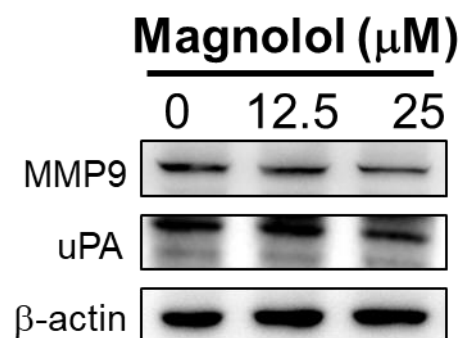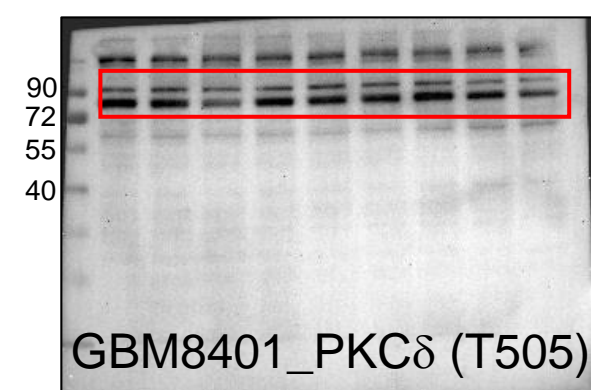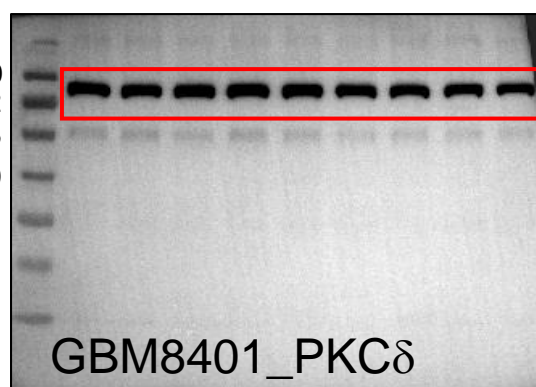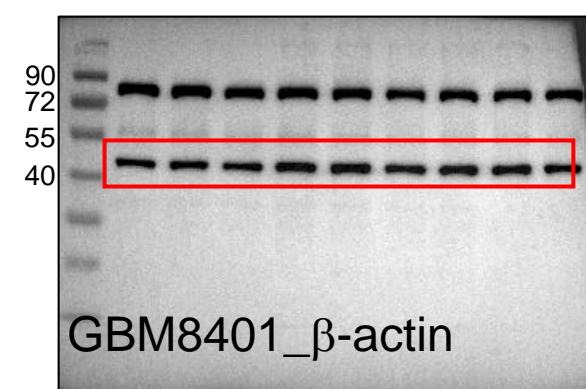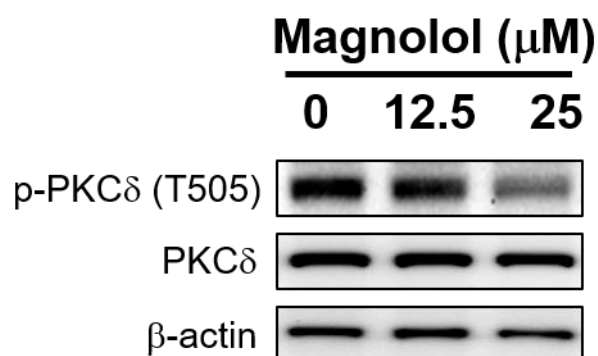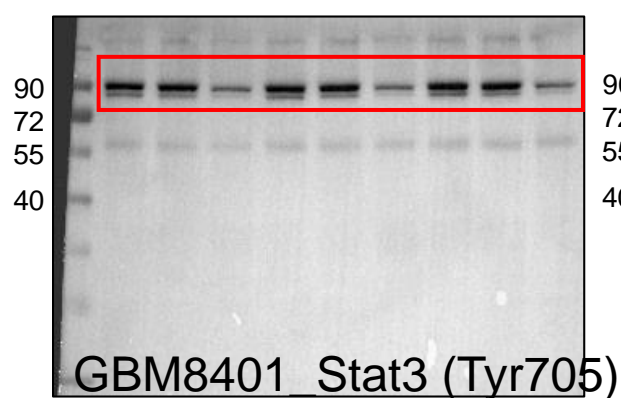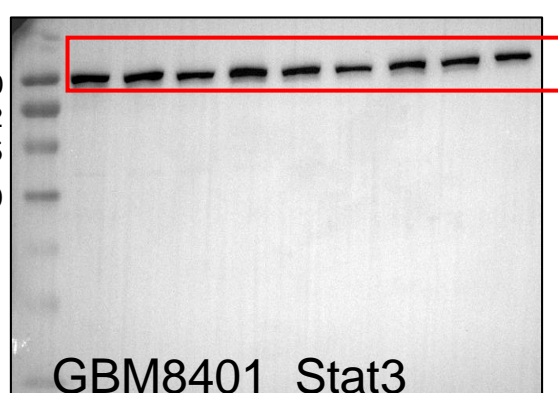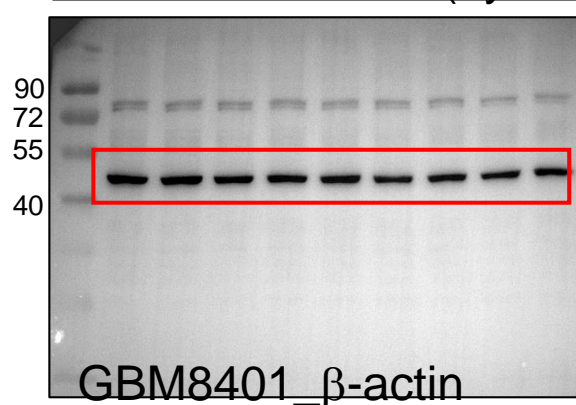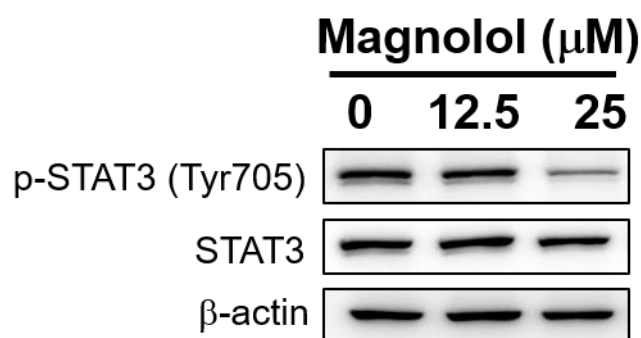

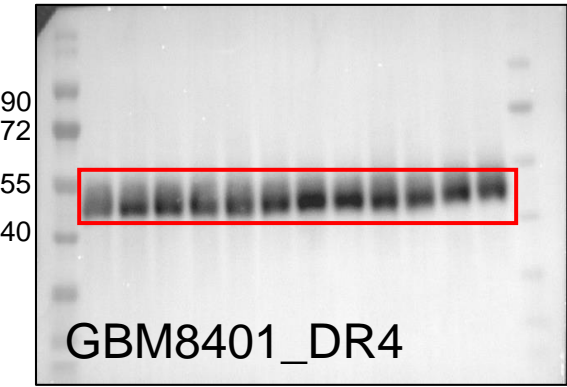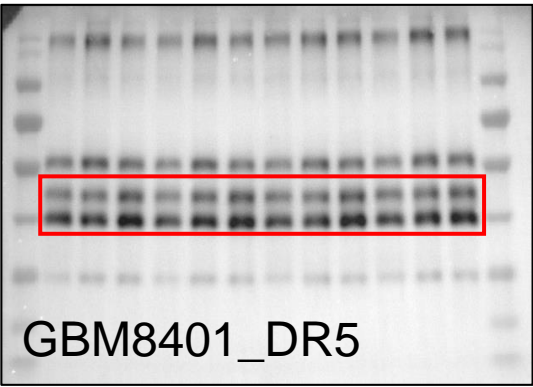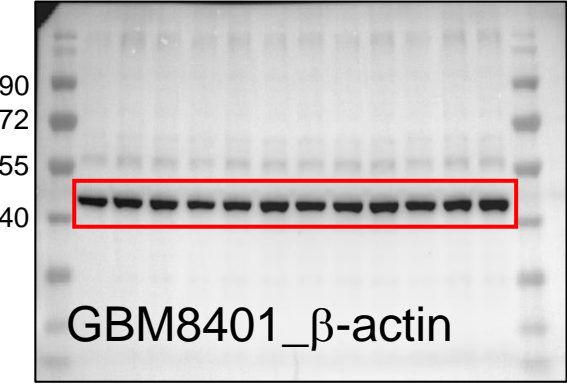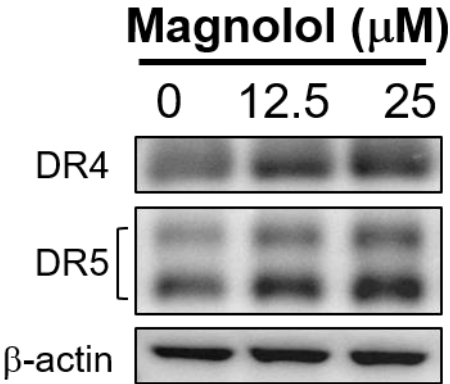

| p-PKC(T505)     | Magnolol 0uM | Magnolol 12.5uM | Magnolol 25uM |
|-----------------|--------------|-----------------|---------------|
| N1              | 1.182859     | 1.104385        | 0.734945      |
| N2              | 0.903166     | 0.813739        | 0.698253      |
| N3              | 0.913975     | 0.762721        | 0.585456      |
|                 |              |                 |               |
| p-STAT3(Tyr705) | Magnolol 0uM | Magnolol 12.5uM | Magnolol 25uM |
| N1              | 0.894428     | 0.88964         | 0.425852      |
| N2              | 1.065182     | 0.921425        | 0.385406      |
| N3              | 1.04039      | 1.029325        | 0.366758      |
|                 |              |                 |               |
| MMP9            | Magnolol 0uM | Magnolol 12.5uM | Magnolol 25uM |
| N1              | 1.080446     | 0.718993        | 0.697082      |
| N2              | 0.919554     | 0.918361        | 0.684845      |
|                 |              |                 |               |
|                 |              |                 |               |
| uPA             | Magnolol 0uM | Magnolol 12.5uM | Magnolol 25uM |
| N1              | 1.011084     | 0.871061        | 0.654434      |
| N2              | 0.988916     | 0.905649        | 0.679247      |

| DR4 | Magnolol 0uM | Magnolol 12.5uM | Magnolol 25uM |
|-----|--------------|-----------------|---------------|
| N1  | 1.016684591  | 1.166600993     | 1.395462534   |
| N2  | 0.864668176  | 1.136984946     | 1.17744816    |
| N3  | 1.028767651  | 1.155784592     | 1.265775472   |
| N4  | 1.089879582  | 1.20300559      | 1.217432504   |
|     |              |                 |               |
| DR5 | Magnolol 0uM | Magnolol 12.5uM | Magnolol 25uM |
| N1  | 1.002716368  | 1.234650576     | 1.500662785   |
| N2  | 0.993136999  | 1.122444222     | 1.363708379   |
| N3  | 1.004146632  | 1.08467696      | 1.39184389    |
| N4  | 0.983370177  | 1.228535669     | 1.251401131   |
| N5  | 1.016629823  | 1.160115212     | 1.235530052   |
